# Supplementary material for: Should you stop wearing neckties?—wearing a tight necktie reduces cerebral blood flow
Source: Springer Nature journal article supplement (doi:10.1007/s00234-018-2048-7), 2018-06-30
Supplement: MOESM1 [file 15896928]

Gray matter perfusion evaluation

All MRI data was exported and post-processed offline on a personal computer running Matlab R2015a (The Mathworks, Natick, MA). The anatomical images (T2 weighted) were segmented for gray matter using statistical parametric mapping (SPM, version 12, The Wellcome Department of Cognitive Neurology, Institute of Neurology, University College London) to evaluate mean gray matter perfusion only rather than gray and white matter perfusion. The resulting binary mask after segmentation consisting of only gray matter was applied to the subtracted ASL image pairs (i.e. perfusion weighted images). Thereby, whole brain gray matter perfusion was evaluated rather than individual brain regions only.


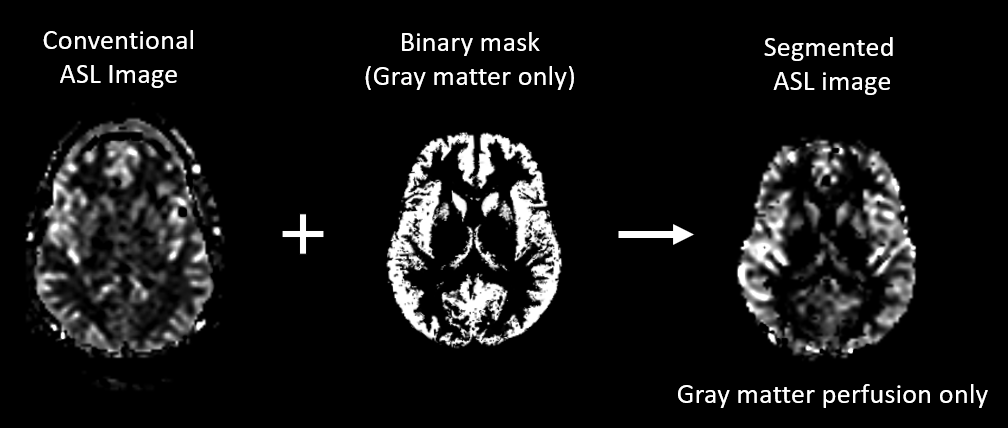


Figure S1: Schematic process of applying the gray matter segmented mask on the ASL perfusion images to obtain gray matter perfusion only
